# Supplementary material for: An intelligent E-skin with spatiotemporal vibrotactile cues enable personalized gait rehabilitation in Parkinson's disease
Source: Research Square preprint supplement (doi:10.21203/rs.3.rs-8883462/v1), 2026-02-18
Supplement: Supplementary file 1 [file 074309598d9ff000dc4316e7.xlsx]

## Sheet: raw
normal_hip_low	normal_knee_low	normal_hip_high	normal_knee_high	nature_hip	nature_knee	4014_hip	4014_knee	401_hip	401_knee	2014_hip	2014_knee	201_hip	201_knee
24.0691	-0.194838	35.1754	3.46533	1.56342	-0.848211	4.38541	0.674219	2.76327	0.914091	5.89775	0.338331	6.89196	-0.23924
24.2297	0.568811	35.487	4.12789	1.49868	-0.952507	4.57025	1.19601	4.23189	1.33065	5.74454	0.47228	6.88246	0.0466161
24.3614	1.32089	35.7624	4.80618	1.43676	-1.04164	4.77065	1.70725	5.60634	1.72613	5.59128	0.599897	6.85813	0.310181
24.465	2.06065	36.0023	5.49815	1.37759	-1.11646	4.98553	2.20746	6.88933	2.10083	5.43806	0.721139	6.81975	0.552033
24.5412	2.78734	36.2076	6.20174	1.32109	-1.17781	5.21384	2.69613	8.08352	2.45505	5.28499	0.835966	6.76813	0.772749
24.5909	3.50021	36.379	6.91489	1.26721	-1.22653	5.45454	3.17279	9.19161	2.7891	5.13218	0.944334	6.70406	0.972907
24.6149	4.19851	36.5173	7.63554	1.21586	-1.26345	5.70656	3.63693	10.2163	3.10329	4.97972	1.0462	6.62833	1.15308
24.614	4.88148	36.6233	8.36162	1.16699	-1.28943	5.96885	4.08808	11.1602	3.3979	4.82772	1.14153	6.54173	1.31386
24.589	5.54839	36.6979	9.09109	1.12052	-1.3053	6.24035	4.52573	12.0261	3.67324	4.67629	1.23028	6.44506	1.45581
24.5405	6.19846	36.7418	9.82187	1.07639	-1.31192	6.52002	4.94939	12.8166	3.92962	4.52552	1.3124	6.33912	1.57951
24.4696	6.83097	36.7559	10.5519	1.03452	-1.31011	6.80678	5.35859	13.5345	4.16734	4.37552	1.38785	6.22468	1.68554
24.3769	7.44515	36.7408	11.2791	0.994842	-1.30072	7.0996	5.75282	14.1823	4.3867	4.2264	1.45659	6.10256	1.77448
24.2632	8.04025	36.6975	12.0015	0.957296	-1.2846	7.39741	6.1316	14.7629	4.58799	4.07825	1.51859	5.97354	1.84691
24.1294	8.61552	36.6266	12.717	0.921808	-1.26258	7.69917	6.49443	15.2788	4.77153	3.93118	1.57379	5.83841	1.9034
23.9762	9.17022	36.5291	13.4234	0.88831	-1.23551	8.00381	6.84082	15.7327	4.93762	3.78529	1.62216	5.69798	1.94453
23.8044	9.70359	36.4056	14.1188	0.856732	-1.20424	8.31027	7.17029	16.1274	5.08655	3.64069	1.66365	5.55302	1.97087
23.6148	10.2149	36.257	14.8011	0.825449	-1.17454	8.61752	7.48234	16.4656	5.21864	3.49434	1.69822	5.40574	1.98302
23.4083	10.7033	36.0841	15.4683	0.796478	-1.14065	8.92448	7.77648	16.7498	5.33417	3.35214	1.72584	5.25536	1.98154
23.1855	11.1682	35.8877	16.1182	0.770036	-1.10357	9.23011	8.05223	16.9829	5.43346	3.21508	1.74645	5.1031	1.96701
22.9474	11.6088	35.6686	16.7488	0.745598	-1.06506	9.53335	8.30908	17.1674	5.5168	3.08151	1.76002	4.9495	1.94
22.6947	12.0242	35.4275	17.3581	0.722882	-1.02635	9.83315	8.54655	17.3061	5.58451	2.95107	1.76651	4.79579	1.90111
22.4282	12.4139	35.1653	17.944	0.701817	-0.988586	10.1284	8.76416	17.4017	5.63687	2.82272	1.76587	4.64232	1.8509
22.1486	12.7769	34.8828	18.5044	0.682083	-0.952747	10.4182	8.9614	17.4568	5.67419	2.69539	1.75806	4.49016	1.78995
21.8569	13.1126	34.5807	19.0373	0.663329	-0.918951	10.7013	9.13779	17.4741	5.69678	2.56794	1.74304	4.33934	1.71884
21.5537	13.4203	34.2598	19.5405	0.645594	-0.88834	10.9768	9.29284	17.4563	5.70493	2.43919	1.72077	4.19056	1.63815
21.2399	13.6991	33.921	20.0122	0.629088	-0.862852	11.2435	9.42605	17.4061	5.69895	2.30811	1.6912	4.04349	1.54846
20.9197	13.9509	33.5839	20.4064	0.613987	-0.841673	11.4764	9.517	17.3605	5.66049	2.17398	1.65322	3.89862	1.45267
20.5882	14.1575	33.2323	20.7604	0.600386	-0.824938	11.6998	9.58413	17.2825	5.61268	2.03605	1.60876	3.75571	1.35024
20.2514	14.3301	32.8578	21.0616	0.588228	-0.810869	11.9129	9.62671	17.1763	5.56034	1.89436	1.55807	3.61518	1.24255
19.9036	14.4355	32.4603	21.3314	0.577357	-0.798387	12.1143	9.64069	17.0462	5.50065	1.7486	1.49884	3.47694	1.12777
19.5504	14.5084	32.0407	21.5415	0.568149	-0.787942	12.3008	9.62415	16.8962	5.42555	1.59947	1.42851	3.3415	1.00169
19.1881	14.5488	31.6001	21.6982	0.560747	-0.779721	12.4716	9.57948	16.7304	5.33497	1.44735	1.3475	3.209	0.865261
18.8328	14.5482	31.1503	21.8028	0.555272	-0.773882	12.6271	9.51428	16.5526	5.2334	1.2928	1.25438	3.08009	0.72007
18.47	14.5173	30.6866	21.8535	0.55189	-0.770401	12.765	9.42783	16.3667	5.1233	1.13667	1.14871	2.95533	0.568198
18.1125	14.4385	30.2241	21.8585	0.550584	-0.768896	12.8841	9.31745	16.1761	5.00477	0.979835	1.03082	2.83537	0.410932
17.7612	14.3225	29.7468	21.803	0.551109	-0.769449	12.9843	9.18251	15.9842	4.87355	0.823254	0.901063	2.72077	0.251515
17.4033	14.1754	29.2501	21.6913	0.553002	-0.771674	13.0676	9.02533	15.794	4.73042	0.667614	0.761098	2.61199	0.0929658
17.0504	13.9946	28.7535	21.533	0.555817	-0.775415	13.1347	8.85075	15.6084	4.57625	0.513462	0.612028	2.50934	-0.0627448
16.6872	13.7842	28.2408	21.3298	0.559182	-0.780646	13.1856	8.65951	15.4294	4.4087	0.361479	0.458826	2.41272	-0.216187
16.3203	13.5397	27.7259	21.0903	0.562754	-0.787587	13.2185	8.45549	15.2588	4.2293	0.212064	0.304368	2.32206	-0.366468
15.97	13.2665	27.2011	20.8097	0.566177	-0.79646	13.2318	8.24082	15.0981	4.03977	0.0658425	0.150722	2.23672	-0.514973
15.624	12.9666	26.6936	20.5095	0.569105	-0.80708	13.2274	8.01309	14.948	3.84182	-0.0771194	-0.00482172	2.15632	-0.665298
15.2663	12.6339	26.1733	20.1765	0.571012	-0.819264	13.2065	7.76882	14.8087	3.63919	-0.216562	-0.161058	2.07991	-0.815462
14.914	12.2988	25.6319	19.8216	0.571345	-0.832284	13.1697	7.50915	14.6794	3.43605	-0.352576	-0.31701	2.00698	-0.963486
14.5462	11.9695	25.1028	19.4513	0.569705	-0.845808	13.1145	7.22521	14.5586	3.23498	-0.48522	-0.472777	1.93633	-1.10744
14.1788	11.6367	24.5695	19.0721	0.566015	-0.859982	13.0404	6.92133	14.4448	3.03488	-0.614681	-0.627368	1.86732	-1.24544
13.8111	11.2989	24.0283	18.7015	0.559926	-0.874155	12.9483	6.58777	14.3363	2.83738	-0.741234	-0.780415	1.7987	-1.37316
13.4441	10.9829	23.4952	18.3479	0.551478	-0.888275	12.8408	6.22332	14.2311	2.64181	-0.865162	-0.929629	1.72987	-1.48914
13.0677	10.69	22.9614	17.9893	0.540566	-0.902275	12.7206	5.83925	14.1271	2.44203	-0.986765	-1.07412	1.65967	-1.59303
12.6911	10.4058	22.4377	17.6482	0.527049	-0.916424	12.5893	5.45233	14.0225	2.23774	-1.10634	-1.21968	1.58754	-1.69027
12.3085	10.1553	21.9146	17.3271	0.510851	-0.929804	12.4485	5.06777	13.9154	2.03628	-1.22432	-1.36625	1.51259	-1.77917
11.938	9.93241	21.4068	17.0191	0.492277	-0.942316	12.3	4.68854	13.804	1.84508	-1.34118	-1.51125	1.43441	-1.8567
11.57	9.7357	20.902	16.7437	0.471635	-0.953999	12.1402	4.31957	13.6863	1.66602	-1.45768	-1.65141	1.35213	-1.9242
11.2077	9.55802	20.4062	16.5151	0.449543	-0.965249	11.9688	3.96551	13.56	1.49786	-1.57428	-1.78574	1.26524	-1.98264
10.8317	9.42195	19.9115	16.3232	0.426544	-0.976885	11.7844	3.63026	13.4228	1.33961	-1.69156	-1.9126	1.1732	-2.03263
10.4453	9.30798	19.4237	16.1713	0.402497	-0.990171	11.5898	3.31991	13.2723	1.18998	-1.80968	-2.02903	1.07583	-2.0683
10.0508	9.21685	18.9427	16.0765	0.377799	-1.00373	11.3861	3.02874	13.1063	1.04796	-1.92896	-2.13415	0.973001	-2.08814
9.63824	9.15963	18.4736	16.0292	0.353168	-1.01692	11.1733	2.75999	12.9222	0.915287	-2.04919	-2.22782	0.864935	-2.09292
9.2341	9.13266	18.0087	16.0308	0.329001	-1.02888	10.9516	2.51215	12.7176	0.788598	-2.17052	-2.30804	0.752	-2.08723
8.82419	9.13175	17.5386	16.0873	0.305976	-1.03922	10.7223	2.28271	12.4901	0.666522	-2.29247	-2.37346	0.634522	-2.07087
8.4043	9.16459	17.0644	16.1972	0.28459	-1.04833	10.4847	2.0757	12.2374	0.550435	-2.41511	-2.42645	0.513105	-2.04754
7.98669	9.22553	16.602	16.3672	0.265	-1.05585	10.2386	1.89729	11.9582	0.436787	-2.53785	-2.46774	0.388253	-2.01446
7.54031	9.31247	16.1489	16.5896	0.247304	-1.06159	9.98536	1.75016	11.6513	0.325757	-2.66029	-2.49649	0.260942	-1.97063
7.08169	9.43532	15.7003	16.8735	0.231728	-1.06798	9.73003	1.63827	11.3164	0.223025	-2.78162	-2.51763	0.131822	-1.91914
6.60978	9.59287	15.2562	17.2135	0.218132	-1.07435	9.46969	1.5633	10.9539	0.132062	-2.90115	-2.53317	0.00184038	-1.8589
6.12945	9.77678	14.8165	17.6014	0.206527	-1.0803	9.2029	1.52418	10.565	0.0555555	-3.01836	-2.54414	-0.128314	-1.78801
5.64852	9.99927	14.3701	18.042	0.197501	-1.08381	8.92816	1.51648	10.151	-0.00217775	-3.13251	-2.54927	-0.257872	-1.6994
5.16097	10.2459	13.926	18.5297	0.190148	-1.08583	8.64583	1.54096	9.71398	-0.03765	-3.24316	-2.54594	-0.386213	-1.58981
4.66565	10.5198	13.4804	19.0768	0.183892	-1.08684	8.35675	1.60582	9.25659	-0.0520329	-3.34961	-2.53062	-0.512963	-1.46487
4.17521	10.8306	13.0429	19.6731	0.178216	-1.08711	8.06141	1.71531	8.78162	-0.0459181	-3.45158	-2.4973	-0.637629	-1.33485
3.68007	11.1687	12.6018	20.3086	0.172656	-1.08627	7.76062	1.86921	8.29198	-0.0186033	-3.54852	-2.44488	-0.760126	-1.19663
3.19855	11.5328	12.1654	20.9896	0.167149	-1.08318	7.45541	2.06499	7.79047	0.0340851	-3.64007	-2.37512	-0.880125	-1.03654
2.71451	11.9301	11.7271	21.705	0.161574	-1.07716	7.14686	2.30402	7.27972	0.113012	-3.72602	-2.29191	-0.997796	-0.848243
2.23615	12.3452	11.2976	22.454	0.155626	-1.0681	6.83579	2.59047	6.76225	0.216935	-3.80619	-2.19491	-1.11318	-0.632042
1.76471	12.7759	10.8732	23.2305	0.148561	-1.05694	6.52285	2.92615	6.24064	0.341313	-3.88058	-2.08999	-1.22679	-0.394504
1.28763	13.2224	10.4469	24.0286	0.140218	-1.04327	6.20932	3.31635	5.71738	0.485666	-3.94928	-1.97655	-1.33883	-0.133232
0.819127	13.6777	10.0196	24.8568	0.13068	-1.02628	5.89593	3.76441	5.19466	0.653051	-4.0127	-1.8532	-1.44979	0.153821
0.348541	14.1503	9.59954	25.702	0.120293	-1.00551	5.58203	4.26779	4.67425	0.841994	-4.0709	-1.71776	-1.55992	0.472823
-0.122957	14.6208	9.16384	26.5507	0.109251	-0.980804	5.26777	4.81818	4.15766	1.05246	-4.12459	-1.56967	-1.66967	0.822411
-0.589878	15.0948	8.72166	27.4269	0.0975491	-0.951744	4.95336	5.41298	3.64602	1.28871	-4.17352	-1.40621	-1.77936	1.20006
-1.05097	15.6062	8.26687	28.3006	0.0859307	-0.916466	4.64079	6.04809	3.13995	1.5533	-4.21903	-1.21961	-1.88932	1.60363
-1.51175	16.1353	7.8067	29.1802	0.074925	-0.875168	4.33051	6.72208	2.63984	1.84647	-4.26071	-1.01029	-1.99991	2.03419
-1.96397	16.6699	7.33689	30.0653	0.0654017	-0.826903	4.02212	7.43408	2.14586	2.1548	-4.29946	-0.782741	-2.11135	2.49259
-2.40298	17.2276	6.8616	30.9496	0.0579362	-0.770729	3.71585	8.179	1.65775	2.47937	-4.33478	-0.539457	-2.22363	2.97938
-2.83014	17.7871	6.37397	31.8428	0.0534536	-0.705103	3.413	8.95304	1.17511	2.82262	-4.36743	-0.280093	-2.33662	3.49406
-3.25362	18.364	5.87835	32.7197	0.0531277	-0.628865	3.11483	9.75249	0.697276	3.18671	-4.39691	-0.0107783	-2.45008	4.03781
-3.67535	18.9472	5.38293	33.5816	0.0585516	-0.540117	2.82135	10.5742	0.223251	3.57133	-4.42286	0.268336	-2.56364	4.61018
-4.08939	19.5175	4.90782	34.4315	0.0702555	-0.438786	2.53361	11.4148	-0.248087	3.96723	-4.44465	0.559274	-2.67669	5.20956
-4.50381	20.0979	4.43796	35.25	0.0882836	-0.3256	2.25458	12.2696	-0.717722	4.37426	-4.46104	0.857887	-2.78893	5.82704
-4.90806	20.6862	3.99438	36.056	0.114952	-0.197221	1.98472	13.1335	-1.18663	4.80036	-4.47161	1.16625	-2.89947	6.46123
-5.29438	21.2901	3.57925	36.8621	0.151104	-0.0526466	1.72449	13.9852	-1.65568	5.25378	-4.47416	1.48834	-3.00791	7.11185
-5.68498	21.9001	3.19703	37.6671	0.197443	0.108724	1.47124	14.8213	-2.12592	5.73381	-4.4679	1.83985	-3.1131	7.78406
-6.07789	22.5368	2.82907	38.4582	0.254808	0.286504	1.2231	15.6496	-2.59818	6.22548	-4.45018	2.2199	-3.21439	8.47999
-6.45064	23.1804	2.46975	39.2713	0.32319	0.479201	0.979469	16.4758	-3.07299	6.72466	-4.41947	2.6301	-3.31028	9.2025
-6.81489	23.8343	2.13557	40.1025	0.403312	0.689869	0.739249	17.2954	-3.5504	7.23536	-4.37356	3.07547	-3.40021	9.95885
-7.14851	24.4907	1.83115	40.9421	0.495765	0.919581	0.505071	18.1255	-4.03	7.7687	-4.31065	3.55274	-3.48236	10.7457
-7.46473	25.1753	1.56757	41.7967	0.599178	1.16515	0.279488	18.9595	-4.51142	8.32474	-4.229	4.05343	-3.55591	11.5647
-7.77026	25.8926	1.34415	42.6526	0.712145	1.42387	0.0648802	19.8138	-4.99396	8.90327	-4.12751	4.57114	-3.61872	12.4139
-8.05864	26.6354	1.16474	43.4987	0.836056	1.69879	-0.139375	20.6973	-5.47636	9.50383	-4.00507	5.105	-3.66989	13.2867
-8.32288	27.3858	1.02978	44.3539	0.9712	1.99119	-0.334952	21.6034	-5.95718	10.1283	-3.86115	5.65561	-3.70694	14.1806
-8.55845	28.1623	0.937209	45.2069	1.11657	2.29957	-0.523954	22.5148	-6.43459	10.7809	-3.69512	6.22781	-3.72836	15.0971
-8.76432	28.9387	0.892319	46.0591	1.27081	2.62112	-0.708296	23.4257	-6.90643	11.4605	-3.50713	6.8211	-3.73184	16.0307
-8.9533	29.7502	0.876702	46.93	1.43261	2.95357	-0.889339	24.3352	-7.37032	12.1595	-3.29755	7.43151	-3.71579	16.9818
-9.11934	30.5847	0.896333	47.7933	1.60165	3.29684	-1.06972	25.2391	-7.82365	12.8717	-3.06729	8.05612	-3.67833	17.9421
-9.25163	31.4368	0.964633	48.6476	1.77749	3.65091	-1.25081	26.1352	-8.26351	13.5999	-2.81818	8.69429	-3.6174	18.904
-9.34229	32.3019	1.08124	49.5072	1.95968	4.01623	-1.42985	27.0238	-8.68672	14.358	-2.55156	9.34667	-3.53221	19.8634
-9.3995	33.1863	1.25588	50.3727	2.14744	4.39179	-1.60649	27.8991	-9.08988	15.1466	-2.26833	10.0107	-3.42117	20.8135
-9.42442	34.0972	1.47383	51.2612	2.34078	4.77858	-1.78037	28.7588	-9.46955	15.9646	-1.96987	10.686	-3.2842	21.7481
-9.4017	35.034	1.73632	52.174	2.53894	5.17548	-1.94868	29.5985	-9.82213	16.8164	-1.65952	11.3762	-3.11984	22.6648
-9.35652	36.0194	2.04163	53.1112	2.7411	5.58136	-2.11012	30.4187	-10.1441	17.6977	-1.33943	12.0782	-2.92895	23.5562
-9.28205	37.0539	2.39084	54.0666	2.9467	5.99535	-2.26336	31.2204	-10.4319	18.6084	-1.01163	12.7885	-2.71098	24.4163
-9.17064	38.1251	2.78874	55.0272	3.15512	6.41656	-2.40417	32.0009	-10.6818	19.5446	-0.676575	13.5066	-2.46721	25.2456
-9.02739	39.2346	3.21502	55.9849	3.36677	6.84601	-2.53115	32.7588	-10.89	20.5071	-0.336344	14.2298	-2.19779	26.0376
-8.84764	40.3553	3.65875	56.9453	3.58074	7.28217	-2.64329	33.49	-11.0534	21.5102	0.00841144	14.9642	-1.90416	26.7847
-8.6288	41.4726	4.14098	57.901	3.79661	7.72417	-2.74293	34.184	-11.169	22.5467	0.356016	15.7124	-1.58768	27.4844
-8.38133	42.5991	4.66616	58.8358	4.01341	8.16999	-2.82981	34.8333	-11.2338	23.6094	0.706958	16.4694	-1.24984	28.1324
-8.08452	43.7155	5.22761	59.7535	4.23037	8.61746	-2.90449	35.4352	-11.2455	24.6916	1.06042	17.2361	-0.892506	28.7205
-7.76177	44.8231	5.81717	60.6533	4.44621	9.06424	-2.96428	35.9916	-11.2017	25.7844	1.41508	18.0109	-0.517491	29.244
-7.402	45.9081	6.42224	61.5203	4.6616	9.51246	-3.00798	36.5002	-11.1006	26.8821	1.77096	18.7896	-0.127167	29.7004
-6.98952	46.9466	7.05304	62.3473	4.87644	9.96182	-3.0333	36.9592	-10.9411	27.9778	2.12898	19.576	0.276193	30.1075
-6.53753	47.9357	7.70183	63.1293	5.08835	10.4076	-3.03949	37.3667	-10.7228	29.0649	2.4908	20.36	0.689967	30.4707
-6.03887	48.8737	8.36152	63.8681	5.29642	10.8473	-3.02617	37.7283	-10.4455	30.1386	2.8554	21.1339	1.11196	30.7867
-5.526	49.7545	9.0454	64.5502	5.49971	11.2785	-3.0012	38.0529	-10.1101	31.1913	3.22403	21.8923	1.53956	31.0354
-4.98711	50.5794	9.74763	65.1798	5.69802	11.7002	-2.96425	38.3374	-9.71737	32.2203	3.59561	22.6293	1.97065	31.2111
-4.43016	51.3471	10.4633	65.739	5.8904	12.1101	-2.91357	38.5685	-9.26883	33.2196	3.97085	23.3372	2.40288	31.313
-3.84531	52.041	11.189	66.2243	6.07597	12.5062	-2.84353	38.746	-8.76625	34.1836	4.34832	24.0161	2.8347	31.3497
-3.23857	52.6557	11.9172	66.6532	6.25267	12.8838	-2.75261	38.8606	-8.21196	35.1	4.72767	24.6626	3.26422	31.3229
-2.60814	53.1906	12.6358	67.0127	6.4206	13.2435	-2.64115	38.9031	-7.60836	35.9641	5.10709	25.2739	3.69014	31.2374
-1.96369	53.6498	13.3382	67.2965	6.57977	13.5849	-2.51287	38.8741	-6.958	36.7727	5.4862	25.8456	4.11085	31.0887
-1.29836	54.0442	14.0424	67.5008	6.729	13.905	-2.36886	38.7795	-6.2633	37.5204	5.86321	26.3743	4.52568	30.876
-0.611876	54.3653	14.7467	67.6214	6.86635	14.199	-2.20764	38.6196	-5.52678	38.1965	6.23687	26.8582	4.93355	30.5973
0.0944689	54.6017	15.4604	67.6657	6.99156	14.4665	-2.02627	38.4057	-4.75098	38.7953	6.60526	27.287	5.33359	30.2576
0.811892	54.7468	16.169	67.6371	7.10461	14.7072	-1.82201	38.1448	-3.93896	39.3123	6.96689	27.6552	5.72499	29.859
1.542	54.7994	16.8779	67.5214	7.20616	14.923	-1.59344	37.8358	-3.09405	39.7579	7.32011	27.9616	6.10693	29.3983
2.26367	54.7559	17.5769	67.328	7.29632	15.1139	-1.33994	37.4717	-2.21943	40.1301	7.66293	28.2062	6.47895	28.8786
2.996	54.6232	18.2854	67.039	7.3741	15.2778	-1.06088	37.0551	-1.31853	40.4253	7.99479	28.3854	6.83966	28.3036
3.72562	54.3977	18.9955	66.6767	7.43926	15.4132	-0.75728	36.6082	-0.394998	40.6423	8.31395	28.5035	7.18914	27.6738
4.45867	54.0717	19.7094	66.2504	7.49293	15.5224	-0.430777	36.1354	0.54709	40.7794	8.61886	28.5634	7.52633	26.993
5.19793	53.6839	20.428	65.7674	7.53483	15.6043	-0.0838076	35.629	1.50321	40.8452	8.90732	28.5712	7.85167	26.2693
5.94036	53.2263	21.1399	65.2474	7.56458	15.6577	0.280084	35.0784	2.46844	40.8414	9.17958	28.5413	8.16368	25.5201
6.68059	52.6911	21.8345	64.685	7.58191	15.6825	0.659579	34.4876	3.43814	40.7654	9.43579	28.4744	8.46286	24.7524
7.41885	52.0808	22.5211	64.0771	7.5879	15.6797	1.05412	33.8722	4.40736	40.611	9.67601	28.3525	8.74847	23.9673
8.15686	51.4078	23.1831	63.4283	7.58362	15.6508	1.4652	33.2432	5.37086	40.3788	9.90013	28.1536	9.02122	23.1669
8.90802	50.6615	23.8485	62.7307	7.56932	15.5957	1.8914	32.6037	6.32338	40.0849	10.1083	27.8817	9.2808	22.3595
9.66061	49.8616	24.5136	61.9652	7.54655	15.5177	2.3319	31.9547	7.25972	39.7392	10.3009	27.5442	9.52754	21.5497
10.4169	49.0176	25.1874	61.1505	7.51604	15.4177	2.78625	31.3027	8.17488	39.3449	10.4785	27.1365	9.76189	20.7354
11.1606	48.1487	25.8487	60.2737	7.47874	15.2982	3.25286	30.6511	9.06416	38.8959	10.6413	26.6593	9.98384	19.9229
11.9075	47.2455	26.5097	59.3249	7.43472	15.1595	3.73247	30.0019	9.92342	38.3955	10.7899	26.1213	10.1938	19.113
12.6612	46.2973	27.1623	58.3361	7.38429	15.0018	4.22107	29.3409	10.7486	37.8474	10.9271	25.5311	10.3914	18.3047
13.4165	45.3203	27.8048	57.3213	7.32766	14.8247	4.71521	28.6635	11.5358	37.2474	11.054	24.8905	10.5777	17.5027
14.1764	44.3271	28.4293	56.2694	7.2662	14.6307	5.218	27.9751	12.2818	36.6003	11.1719	24.1966	10.7528	16.7088
14.9251	43.3178	29.0456	55.1892	7.20164	14.423	5.72837	27.2833	12.9834	35.9112	11.28	23.4543	10.9177	15.9257
15.6798	42.3304	29.6484	54.0767	7.13405	14.2017	6.24361	26.591	13.638	35.1911	11.3803	22.6684	11.0724	15.1577
16.4256	41.3351	30.2556	52.946	7.0634	13.9669	6.75938	25.8912	14.2435	34.4488	11.4723	21.8464	11.2173	14.4005
17.1671	40.3364	30.8606	51.8049	6.98935	13.7176	7.27483	25.1859	14.7985	33.6937	11.5571	20.9962	11.3526	13.6558
17.8891	39.3544	31.4533	50.6517	6.91204	13.4539	7.78962	24.4781	15.3015	32.9334	11.6338	20.1268	11.4784	12.9045
18.597	38.3916	32.037	49.4965	6.83128	13.1748	8.30435	23.7687	15.7517	32.1643	11.7029	19.2438	11.5948	12.1373
19.2858	37.4626	32.6016	48.3558	6.74784	12.8815	8.81823	23.0603	16.1488	31.3901	11.7637	18.3541	11.701	11.3634
19.9604	36.5433	33.1517	47.2201	6.66238	12.5749	9.32908	22.3553	16.4932	30.6153	11.8158	17.4628	11.7967	10.6172
20.6145	35.6456	33.6904	46.08	6.57496	12.2551	9.83588	21.6563	16.786	29.8386	11.8579	16.571	11.8809	9.90253
21.258	34.751	34.2143	44.9435	6.48508	11.9213	10.337	20.9658	17.0283	29.0665	11.8891	15.6848	11.9532	9.21963
21.8879	33.8475	34.7099	43.8074	6.39378	11.5752	10.8288	20.2853	17.2223	28.3013	11.9095	14.8026	12.0124	8.55852
22.5015	32.9277	35.1864	42.6824	6.30108	11.2168	11.3082	19.615	17.3701	27.5461	11.9179	13.9327	12.0584	7.91803
23.0958	31.984	35.6481	41.5595	6.20793	10.8491	11.7725	18.9479	17.4739	26.8048	11.9137	13.0841	12.0899	7.29954
23.6765	31.0375	36.0909	40.4438	6.11437	10.4729	12.2188	18.2845	17.5364	26.0656	11.8952	12.2563	12.1066	6.70786
24.2304	30.1022	36.5077	39.326	6.01907	10.086	12.6435	17.628	17.5603	25.3358	11.8625	11.4499	12.1071	6.14442
24.788	29.1461	36.8861	38.207	5.9222	9.68869	13.0426	16.9806	17.5486	24.6146	11.8144	10.6694	12.0919	5.60911
25.3042	28.1859	37.2211	37.0991	5.82412	9.28381	13.4148	16.3419	17.5043	23.8889	11.7509	9.91361	12.0599	5.10574
25.803	27.1894	37.5199	35.9714	5.72443	8.87118	13.758	15.7095	17.4299	23.1568	11.671	9.18593	12.0115	4.63626
26.2717	26.1831	37.7911	34.8405	5.62295	8.45243	14.0702	15.0857	17.3281	22.4184	11.5739	8.48725	11.9462	4.19869
26.7026	25.1804	38.0268	33.7077	5.52067	8.03059	14.3476	14.4753	17.202	21.6785	11.4585	7.80661	11.8644	3.77913
27.0799	24.1812	38.245	32.5744	5.41815	7.60855	14.588	13.8805	17.0546	20.9375	11.3244	7.14617	11.7651	3.37677
27.4127	23.1794	38.4363	31.4332	5.31423	7.1856	14.7886	13.2974	16.8891	20.1921	11.1682	6.51116	11.6469	2.99669
27.7105	22.1745	38.591	30.2871	5.20904	6.76432	14.9573	12.7171	16.709	19.4425	10.9913	5.90351	11.5091	2.64681
27.9776	21.1475	38.7162	29.1366	5.10316	6.34722	15.0963	12.1372	16.5177	18.6845	10.7926	5.32406	11.3502	2.32695
28.2347	20.0963	38.8282	28.0108	4.99613	5.9348	15.2198	11.5719	16.2657	17.9245	10.5747	4.78639	11.1704	2.04054
28.4597	19.0503	38.9145	26.889	4.88753	5.52805	15.317	11.0166	16.0044	17.1643	10.3378	4.27224	10.9699	1.77411
28.6516	18.0115	38.975	25.7719	4.77683	5.12701	15.3875	10.472	15.7368	16.4043	10.0851	3.78189	10.7501	1.52693
28.8099	16.9819	39.01	24.66	4.66475	4.73425	15.4311	9.93813	15.4655	15.6451	9.81973	3.31563	10.5133	1.29823
28.9337	15.9637	39.0195	23.554	4.5526	4.35362	15.4478	9.41551	15.1936	14.8873	9.54475	2.87374	10.2614	1.08726
29.0225	14.9589	39.0034	22.4544	4.44012	3.98584	15.4371	8.90446	14.9236	14.1311	9.26629	2.45651	9.99728	0.893281
29.0754	13.9697	38.962	21.3619	4.32674	3.63026	15.3991	8.40532	14.6586	13.3773	8.98839	2.06422	9.72445	0.715532
29.0917	12.9981	38.8952	20.277	4.21198	3.28665	15.3334	7.91843	14.4012	12.6261	8.71673	1.69717	9.44685	0.553263
29.0707	12.0463	38.8031	19.2003	4.09662	2.95718	15.2398	7.44414	14.1544	11.8783	8.45649	1.35563	9.16906	0.405722
29.0117	11.1163	38.6858	18.1324	3.98117	2.64301	15.1181	6.9828	13.9209	11.1341	8.21023	1.03988	8.89485	0.272158
28.9141	10.2103	38.5434	17.074	3.86208	2.33878	14.9682	6.53476	13.7035	10.3942	7.95423	0.750227	8.61162	0.151818
28.7769	9.33024	38.3758	16.0255	3.74332	2.04828	14.7899	6.10035	13.5052	9.65902	7.71075	0.486941	8.33518	0.0439516
28.5996	8.47833	38.1833	14.9876	3.62525	1.7721	14.5828	5.67994	13.3286	8.92904	7.48263	0.250311	8.06855	-0.0521933
28.3815	7.65663	37.9658	13.961	3.50822	1.51084	14.3469	5.27385	13.1766	8.20478	7.27272	0.0406222	7.81477	-0.137369
28.1217	6.86723	37.7234	12.9461	3.39258	1.26509	14.0819	4.88246	13.052	7.48671	7.08387	-0.14184	7.57687	-0.212326
27.8197	6.11224	37.4561	11.9436	3.27869	1.03545	13.7877	4.50608	12.9577	6.77534	6.91893	-0.296791	7.3579	-0.277817
27.4746	5.39374	37.1641	10.954	3.1669	0.822507	13.4639	4.14509	12.8964	6.07115	6.78074	-0.423944	7.16088	-0.334593
27.0857	4.71383	36.8474	9.97807	3.05755	0.626857	13.1105	3.79982	12.871	5.37464	6.67217	-0.523015	6.98885	-0.383407
26.6524	4.07461	36.5061	9.01626	2.95101	0.449093	12.7271	3.47061	12.8843	4.6863	6.59605	-0.593718	6.84485	-0.425009
26.1739	3.47816	36.1401	8.06921	2.84763	0.289812	12.3137	3.15783	12.9392	4.00663	6.55523	-0.635768	6.73191	-0.460152
25.6495	2.92658	35.7497	7.1375	2.74776	0.149606	11.87	2.8618	13.0383	3.33611	6.55257	-0.64888	6.65307	-0.489588
25.0785	2.42197	35.3348	6.22173	2.65175	0.0290692	11.3958	2.58289	13.1846	2.67525	6.5909	-0.632767	6.61136	-0.514067
24.4601	1.96643	34.8956	5.32249	2.55995	-0.0712034	10.8908	2.32143	13.3809	2.02452	6.67309	-0.587146	6.60981	-0.534343
23.7936	1.56203	34.432	4.44038	2.47272	-0.150618	10.355	2.07777	13.63	1.38444	6.80198	-0.51173	6.65147	-0.551165
23.0784	1.21089	33.9442	3.57599	2.39042	-0.208581	9.78805	1.85227	13.9347	0.755478	6.98041	-0.406235	6.73937	-0.565287

## Sheet: Angle_Distance
Patient_ID	Control	ConsVib_40Hz	ConsVib_20Hz	SpaVib_40Hz	SpaVib_20Hz
P01	8.04	7.58	7.83	5.19	6.03
P02	5.61	4.65	5.95	3.83	4.98
P03	5.42	4.44	4.95	4.67	5.85
P04	5.29	5.05	5.94	4.04	3.27
P05	1.48	1.29	1.38	0.34	0.49
P06	8.94	6.44	6.19	5.21	3.09
P07	4.06	3.05	2.08	0.98	0.77
P08	5.01	1.5	4.91	0.31	0.53
P09	5.42	6.04	3.83	2.81	4.3
P10	4.4	3.57	2.92	2.87	4.22
P11	5.42	5.83	3.83	5.49	4.13
P12	9.3	6.92	3.83	5.04	6.37
P13	5.42	3.68	3.83	4.23	4.88
P14	8.94	6.44	6.19	5.21	3.09
P15	5.61	4.65	5.95	3.83	4.98
P16	7.236	6.822	7.047	4.671	5.427
P17	7.31217	6.89381	7.12118	4.72017	5.48413
P18	5.15529	4.27311	5.46774	3.51957	4.57636
P19	5.03204	4.12219	4.59568	4.33573	5.43126
P20	5.08339	4.16425	4.64258	4.37997	5.48668
P21	5.01158	4.78421	5.62737	3.82737	3.09789
P22	1.41613	1.23433	1.32044	0.325326	0.468853
P23	8.63886	6.22307	5.98149	5.03451	2.98592
P24	8.72356	6.28408	6.04014	5.08386	3.01519
P25	4.00017	3.00505	2.04935	0.965558	0.758653
P26	4.98363	1.49211	4.88416	0.308368	0.527211
P27	5.44282	6.06543	3.84613	2.82183	4.31811
P28	5.49417	6.12265	3.88241	2.84845	4.35884
P29	4.50189	3.65267	2.98762	2.93646	4.31773
P30	5.59686	6.02024	3.95498	5.66915	4.26477
P31	9.69158	7.21137	3.99126	5.25221	6.63821
P32	9.77968	7.27693	4.02755	5.29996	6.69856
P33	5.75091	3.90467	4.06383	4.48825	5.17794
P34	9.57051	6.89419	6.62656	5.57744	3.30793
P35	6.0588	5.022	6.426	4.1364	5.3784

## Sheet: Angle_Distance_Desc
	count	Mean	SD	Min	P25	Median	P75	Max	reduce
Control	35	6.08114	2.12021	1.41613	5.02181	5.44282	7.67608	9.77968
ConsVib_40Hz	35	4.93138	1.82253	1.23433	3.79234	5.022	6.36204	7.58	0.18907
ConsVib_20Hz	35	4.69124	1.63397	1.32044	3.83	4.64258	5.96575	7.83	0.228559
SpaVib_40Hz	35	3.72147	1.68926	0.308368	2.85923	4.23	5.06193	5.66915	0.388031
SpaVib_20Hz	35	3.96285	1.86321	0.468853	3.09	4.31773	5.4027	6.69856	0.348339

## Sheet: Angle_Variance
Patient_ID	Control	ConsVib_40Hz	ConsVib_20Hz	SpaVib_40Hz	SpaVib_20Hz
P01	9.68	10.14	9.63	7.11	8.33
P02	4.68	3.06	4.5	2.53	3.45
P03	3.59	2.65	4.05	2.7	3.86
P04	6.03	4.5	0.99	5.72	2.4
P05	1.4	1.75	1.91	1.79	2.04
P06	8.6	2.67	3.68	3.74	2.57
P07	1.5	1.27	1.54	0.63	3.69
P08	3.27	1.88	5.34	1.47	1.25
P09	13.27	11.23	9.21	10.47	9.73
P10	6.87	6.96	6.79	6.68	6.59
P11	3.27	3.01	3.21	3.36	3.12
P12	5.4	3.87	5.21	4.17	3.21
P13	3.27	3	3.21	2.81	2.03
P14	8.94	6.44	6.19	5.21	3.09
P15	5.61	4.65	5.95	3.83	4.98
P16	8.712	9.126	8.667	4.399	4.497
P17	8.80371	9.22206	8.75823	4.46636	3.57592
P18	4.30067	2.81198	4.13526	1.32494	3.17037
P19	3.33303	2.46032	3.76011	2.50674	3.58371
P20	3.36704	2.48542	3.79847	1.53232	3.62027
P21	5.71263	4.26316	0.937895	3.41895	2.27368
P22	1.33958	1.67447	1.82757	1.71275	1.95196
P23	8.31032	2.58006	3.55604	3.61402	2.48343
P24	8.39179	2.60536	3.59091	1.64945	2.50778
P25	1.47789	1.25128	1.51731	0.620716	3.63562
P26	3.25279	1.87011	5.31189	1.46226	1.24342
P27	13.3259	11.2773	9.24878	7.51408	7.77097
P28	13.4516	11.3837	9.33603	8.61327	8.86315
P29	7.02909	7.12118	6.94724	3.83469	3.74261
P30	3.37671	3.10822	3.31475	1.46964	1.22181
P31	5.62737	4.03295	5.42937	4.34558	3.34516
P32	5.67853	4.06961	5.47873	2.38508	2.37557
P33	3.46964	3.18316	3.40598	2.98156	2.15394
P34	9.57051	6.89419	6.62656	5.57744	3.30793
P35	6.0588	5.022	6.426	4.1364	5.3784

## Sheet: Angle_Variance_Desc
	count	Mean	SD	Min	P25	Median	P75	Max
Control	35	5.99913	3.36035	1.33958	3.35004	5.62737	8.49589	13.4516
ConsVib_40Hz	35	4.67207	3.07884	1.25128	2.59271	3.18316	6.66709	11.3837	0.221209
ConsVib_20Hz	35	4.95669	2.52611	0.937895	3.36036	4.5	6.52628	9.63	0.173765
SpaVib_40Hz	35	3.70815	2.30018	0.620716	1.75137	3.41895	4.43268	10.47	0.381885
SpaVib_20Hz	35	3.74408	2.13423	1.22181	2.38778	3.30793	3.80131	9.73	0.375897
	F_oneway	p_oneway
AngleVariance_ANOVA	4.27672	0.00253277
