# Supplementary material for: An intelligent E-skin with spatiotemporal vibrotactile cues enable personalized gait rehabilitation in Parkinson's disease
Source: Research Square preprint supplement (doi:10.21203/rs.3.rs-8883462/v1), 2026-02-18
Supplement: Supplementary file 2 [file 1b0490c4b27fce97ab9b0b36.xlsx]

## Sheet: SinglePatient_Stride
Condition	Step1	Step2	Step3	Step4	Step5	Step6	Step7	Step8	Step9	Step10	Step11	Step12	Step13
Control	0.441727	0.719754	0.00613781	0.784598	0.858438	0.0519165	0.841376	0.00439997	0.837632	0.695974	0.801254	0.820147	0.849761
ConsVib_40Hz	0.823338	0.873064	0.934638	0.860656	0.930864	0.952167	1.02227	0.929514	0.824592	0.889028	0.888896	0.938682	0.880735
ConsVib_20Hz	0.88696	0.831376	0.959832	0.991652	0.922209	0.996347	0.828528	0.724544	0.817358	0.818817	0.90063	0.964928	0.897557
SpaVib_40Hz	0.936146	0.958903	0.945151	0.918135	0.960662	0.92517	0.923464	0.880318	0.929983	0.971703	1.00013	0.940329	0.885304
SpaVib_20Hz	0.729405	0.689169	0.788703	0.789822	0.796354	0.861966	0.830518	0.825362	0.846256	0.799175	0.694705	0.736804	0.793832

## Sheet: SinglePatient_Duration
Condition	Step1	Step2	Step3	Step4	Step5	Step6	Step7	Step8	Step9	Step10	Step11	Step12	Step13
Control	2.08	0.83	0.76	1.35	0.66	0.78	0.57	0.6	0.68	1.91	1.47	1.29	1.31
ConsVib_40Hz	1.23	0.73	0.63	1.08	1.19	1.19	1.3	1.22	1.22	1.2	1.24	1.12	1.21
ConsVib_20Hz	1.13	1.07	1.08	0.88	1.27	0.89	0.96	1.46	0.73	1.08	0.75	1.45	1.07
SpaVib_40Hz	1.37	1.29	1.22	1.24	1.26	1.28	1.35	1.36	1.39	1.24	1.26	1.26	1.17
SpaVib_20Hz	1.08	1.12	1.04	1.06	1.06	1.03	1.09	1.05	0.99	1.05	1.07	1.06	1.09

## Sheet: SinglePatient_SupportRatio
Condition	Step1	Step2	Step3	Step4	Step5	Step6	Step7	Step8	Step9	Step10	Step11	Step12	Step13
Control	0.769231	0.542169	0.605263	0.688889	0.393939	0.333333	0.54386	0.566667	0.470588	0.659686	0.639456	0.651163	0.618321
ConsVib_40Hz	0.724138	0.699187	0.75	0.697479	0.672269	0.737864	0.717742	0.607692	0.598361	0.581967	0.591667	0.629032	0.544643
ConsVib_20Hz	0.654867	0.654206	0.62963	0.534091	0.535433	0.550562	0.564583	0.687671	0.493151	0.638889	0.426667	0.482759	0.607477
SpaVib_40Hz	0.759124	0.697674	0.688525	0.677419	0.698413	0.703125	0.696296	0.698529	0.589928	0.596774	0.611111	0.626984	0.612903
SpaVib_20Hz	0.685185	0.669643	0.615385	0.650943	0.698113	0.650485	0.633028	0.619048	0.636364	0.657143	0.579439	0.566038	0.568807

## Sheet: Stride_35Patients
Patient_ID	Control	ConsVib_40Hz	ConsVib_20Hz	SpaVib_40Hz	SpaVib_20Hz
P01	0.11	0.07	0.07	0.06	0.06
P02	0.1	0.08	0.14	0.07	0.06
P03	0.33	0.05	0.08	0.03	0.05
P04	0.11	0.1	0.08	0.06	0.07
P05	0.09	0.07	0.04	0.03	0.04
P06	0.26	0.08	0.09	0.09	0.08
P07	0.12	0.04	0.05	0.03	0.03
P08	0.21	0.2	0.16	0.12	0.15
P09	0.13	0.05	0.04	0.06	0.07
P10	0.24	0.21	0.19	0.12	0.16
P11	0.27	0.19	0.16	0.11	0.07
P12	0.34	0.16	0.27	0.12	0.2
P13	0.43	0.26	0.24	0.16	0.17
P14	0.34	0.25	0.26	0.13	0.14
P15	0.26	0.23	0.21	0.11	0.13
P16	0.09	0.057	0.057	0.049	0.049
P17	0.084	0.067	0.117	0.058	0.05
P18	0.28	0.042	0.068	0.026	0.042
P19	0.095	0.087	0.069	0.052	0.061
P20	0.079	0.062	0.035	0.026	0.035
P21	0.233	0.072	0.081	0.081	0.072
P22	0.109	0.036	0.046	0.027	0.027
P23	0.194	0.185	0.148	0.111	0.139
P24	0.122	0.047	0.038	0.056	0.066
P25	0.229	0.201	0.181	0.115	0.153
P26	0.262	0.184	0.155	0.107	0.068
P27	0.335	0.158	0.266	0.118	0.197
P28	0.43	0.26	0.24	0.16	0.17
P29	0.345	0.254	0.264	0.132	0.142
P30	0.268	0.237	0.216	0.113	0.134
P31	0.115	0.073	0.073	0.063	0.063
P32	0.106	0.085	0.148	0.074	0.064
P33	0.355	0.054	0.086	0.032	0.054
P34	0.12	0.109	0.087	0.065	0.076
P35	0.099	0.077	0.044	0.033	0.044

## Sheet: Stride_35Patients_Desc
	count	Mean	SD	Min	P25	Median	P75	Max	reduce
Control	35	0.208286	0.108635	0.079	0.1095	0.21	0.275	0.43
ConsVib_40Hz	35	0.125343	0.0772193	0.036	0.0645	0.085	0.195	0.26	0.398217
ConsVib_20Hz	35	0.128543	0.0781188	0.035	0.0685	0.09	0.1855	0.27	0.382853
SpaVib_40Hz	35	0.0799429	0.0403885	0.026	0.0505	0.07	0.114	0.16	0.616187
SpaVib_20Hz	35	0.0910286	0.0516034	0.027	0.052	0.07	0.1395	0.2	0.562963
	F_oneway	p_oneway
Stride_ANOVA	15.7222	5.75285e-11

## Sheet: Duration_35Patients
Patient_ID	Control	ConsVib_40Hz	ConsVib_20Hz	SpaVib_40Hz	SpaVib_20Hz
P01	0.11	0.07	0.07	0.06	0.06
P02	0.07	0.05	0.05	0.04	0.02
P03	0.31	0.2	0.22	0.06	0.03
P04	0.13	0.15	0.09	0.05	0.05
P05	0.11	0.11	0.13	0.09	0.08
P06	0.19	0.08	0.13	0.07	0.07
P07	0.12	0.11	0.12	0.06	0.02
P08	0.06	0.05	0.05	0.02	0.03
P09	0.08	0.04	0.04	0.04	0.04
P10	0.18	0.08	0.08	0.06	0.07
P11	0.15	0.05	0.07	0.02	0.04
P12	0.19	0.07	0.09	0.05	0.07
P13	0.24	0.16	0.13	0.12	0.13
P14	0.21	0.2	0.2	0.12	0.15
P15	0.31	0.19	0.18	0.14	0.11
P16	0.09	0.06	0.06	0.05	0.05
P17	0.06	0.04	0.04	0.03	0.02
P18	0.26	0.17	0.19	0.05	0.03
P19	0.11	0.13	0.08	0.04	0.05
P20	0.09	0.1	0.12	0.08	0.07
P21	0.17	0.07	0.12	0.06	0.06
P22	0.11	0.1	0.11	0.05	0.02
P23	0.05	0.04	0.04	0.02	0.03
P24	0.07	0.03	0.03	0.04	0.04
P25	0.17	0.08	0.08	0.05	0.06
P26	0.14	0.05	0.06	0.02	0.03
P27	0.18	0.07	0.09	0.05	0.06
P28	0.24	0.16	0.13	0.12	0.13
P29	0.22	0.2	0.21	0.12	0.15
P30	0.32	0.2	0.19	0.15	0.12
P31	0.12	0.07	0.07	0.06	0.06
P32	0.07	0.05	0.05	0.04	0.02
P33	0.33	0.21	0.24	0.07	0.03
P34	0.14	0.17	0.1	0.05	0.06
P35	0.12	0.12	0.15	0.1	0.09

## Sheet: Duration_35Patients_Desc
	count	Mean	SD	Min	P25	Median	P75	Max	reduce
Control	35	0.157714	0.0804797	0.05	0.1	0.14	0.2	0.33
ConsVib_40Hz	35	0.106571	0.0582057	0.03	0.055	0.08	0.16	0.21	0.324275
ConsVib_20Hz	35	0.108857	0.057893	0.03	0.065	0.09	0.13	0.24	0.309783
SpaVib_40Hz	35	0.0642857	0.0349189	0.02	0.04	0.05	0.075	0.15	0.592391
SpaVib_20Hz	35	0.0614286	0.0378187	0.02	0.03	0.06	0.07	0.15	0.610507

## Sheet: SupportRatio_35Patients
Patient_ID	Control	ConsVib_40Hz	ConsVib_20Hz	SpaVib_40Hz	SpaVib_20Hz
P01	0.06	0.03	0.06	0.03	0.04
P02	0.04	0.02	0.03	0.01	0.02
P03	0.12	0.07	0.11	0.05	0.04
P04	0.09	0.06	0.07	0.04	0.03
P05	0.04	0.06	0.02	0.02	0.02
P06	0.03	0.04	0.03	0.03	0.04
P07	0.08	0.02	0.06	0.06	0.03
P08	0.05	0.04	0.03	0.02	0.03
P09	0.08	0.05	0.03	0.04	0.06
P10	0.06	0.04	0.04	0.05	0.06
P11	0.07	0.06	0.05	0.03	0.04
P12	0.07	0.06	0.05	0.04	0.03
P13	0.07	0.07	0.06	0.05	0.04
P14	0.08	0.06	0.06	0.03	0.04
P15	0.13	0.1	0.06	0.02	0.04
P16	0.049	0.025	0.049	0.025	0.033
P17	0.033	0.017	0.025	0.008	0.017
P18	0.102	0.06	0.094	0.042	0.034
P19	0.078	0.052	0.061	0.035	0.026
P20	0.035	0.053	0.018	0.018	0.018
P21	0.027	0.036	0.027	0.027	0.036
P22	0.073	0.018	0.055	0.055	0.027
P23	0.046	0.037	0.028	0.018	0.028
P24	0.075	0.047	0.028	0.038	0.056
P25	0.057	0.038	0.038	0.048	0.057
P26	0.068	0.058	0.048	0.029	0.039
P27	0.069	0.059	0.049	0.039	0.03
P28	0.07	0.07	0.06	0.05	0.04
P29	0.081	0.061	0.061	0.03	0.041
P30	0.134	0.103	0.062	0.021	0.041
P31	0.063	0.031	0.063	0.031	0.042
P32	0.042	0.021	0.032	0.011	0.021
P33	0.129	0.075	0.118	0.054	0.043
P34	0.098	0.065	0.076	0.044	0.033
P35	0.044	0.066	0.022	0.022	0.022

## Sheet: SupportRatio_35Patients_Desc
	count	Mean	SD	Min	P25	Median	P75	Max	reduce
Control	35	0.0698	0.0284634	0.027	0.0475	0.07	0.08	0.134
ConsVib_40Hz	35	0.0506286	0.0213088	0.017	0.0365	0.053	0.0605	0.103	0.274662
ConsVib_20Hz	35	0.0506857	0.0238892	0.018	0.03	0.05	0.0605	0.118	0.273844
SpaVib_40Hz	35	0.0332857	0.0137959	0.008	0.0215	0.03	0.043	0.06	0.523127
SpaVib_20Hz	35	0.0355429	0.0112755	0.017	0.029	0.036	0.04	0.06	0.49079
