# Supplementary material for: An intelligent E-skin with spatiotemporal vibrotactile cues enable personalized gait rehabilitation in Parkinson's disease
Source: Research Square preprint supplement (doi:10.21203/rs.3.rs-8883462/v1), 2026-02-18
Supplement: Supplementary file 4 [file efe0f1f7c71b1977b62f0205.xlsx]

## Sheet: Muscle_Raw
Patient_ID	SE_SpaVib_40Hz	SE_SpaVib_20Hz	SE_ConsVib_20Hz	SE_ConsVib_40Hz	BF_SpaVib_40Hz	BF_SpaVib_20Hz	BF_ConsVib_20Hz	BF_ConsVib_40Hz	VL_SpaVib_40Hz	VL_SpaVib_20Hz	VL_ConsVib_20Hz	VL_ConsVib_40Hz	RF_SpaVib_40Hz	RF_SpaVib_20Hz	RF_ConsVib_20Hz	RF_ConsVib_40Hz
P01	0.0647938	0.0555716	0.0801911	0.0635971	0.0681368	0.026716	-0.0339224	-0.00884453	0.389359	0.41021	-0.00261795	-0.0442539	-0.115813	-0.0521079	0.0529586	0.139311
P02	0.199686	0.0975832	0.00776624	-0.00297043	0.112721	-0.0485567	0.0429152	-0.0139142	0.586545	0.0147155	0.00516312	-0.0976426	0.486545	0.214715	0.00516312	-0.0976426
P03	0.752791	0.65744	0.79286	0.628879	0.631577	0.591269	0.623667	0.590593	0.770222	0.760822	0.785089	0.732416	0.735526	0.679752	0.672965	0.66
P04	0.0823781	0.207436	-0.0910187	-0.0908601	0.170152	0.144896	0.304506	0.304817	0.11889	0.10079	0.0552745	0.0556726	0.360739	0.209775	-0.0122796	-0.011561
P05	0.113418	0.278598	0.289292	-0.14936	0.380868	0.201001	-0.265209	-1.24016	0.141662	0.216029	0.320744	0.142577	0.32781	0.0110983	-0.604813	-0.0405476
P06	0.169417	0.169046	0.151321	0.127882	0.259729	0.239298	0.0631004	0.0998449	0.424386	0.35285	0.197227	0.0936356	0.348415	0.262806	0.109846	0.10089
P07	0.145819	0.210679	0.160175	0.133481	0.276273	0.253768	0.11834	0.00574185	0.496847	0.362441	0.126108	0.172085	0.387864	0.240492	0.0707973	0.158973
P08	0.33509	0.281808	0.0350903	0.281808	0.092867	0.095717	0.092867	0.095717	0.240179	0.162903	-0.162903	-0.156213	0.090539	0.161817	0.090539	0.161817
P09	0.201919	0.285203	0.285203	-0.127751	0.0825206	0.0283075	0.0283075	-0.0542578	-0.0175189	0.162218	-0.0175189	0.162218	0.0883034	-0.066133	-0.066133	-0.1656
P10	-0.0806967	0.244595	0.0538412	0.0538412	0.336437	0.32494	0.259427	0.259427	-0.134281	0.00861978	-0.110017	-0.110017	-0.0828523	-0.0573447	-0.0658207	-0.0658207
P11	0.158235	0.192346	0.134568	0.0789456	0.194568	0.178901	0.123457	0.0678901	0.278901	0.256789	0.0678901	0.0345679	0.223457	0.156789	0.0456789	0.0890123
P12	0.0945679	0.223457	0.0678901	-0.0345679	0.223457	0.156789	0.0890123	-0.0234568	0.345679	0.289012	0.123457	0.0789456	0.278901	0.189012	0.0789456	0.123457
P13	0.276543	0.187654	0.198765	0.145679	0.278901	0.198765	0.145679	0.0789456	0.198765	0.223457	0.0456789	-0.0123457	0.16789	0.134568	0.0234568	0.0678901
P14	0.123457	0.256789	0.0890123	0.0678901	0.16789	0.134568	0.112346	0.0456789	0.312346	0.26789	0.0890123	0.056789	0.312346	0.223457	0.0987654	0.145679
P15	0.187654	0.234568	0.156789	0.0987654	0.245679	0.189012	0.134568	0.0890123	0.26789	0.234568	0.0789456	0.0234568	0.256789	0.178901	0.0678901	0.112346
P16	0.0583144	0.0500144	0.072172	0.0572374	0.0613231	0.0240444	-0.0305301	-0.00796008	0.350423	0.369189	-0.00235616	-0.0398285	-0.104232	-0.0468971	0.0476628	0.12538
P17	0.0589282	0.0505409	0.0729317	0.0578399	0.0619686	0.0242975	-0.0308515	-0.00804387	0.354112	0.373076	-0.00238096	-0.0402478	-0.105329	-0.0473908	0.0481645	0.1267
P18	0.183501	0.0896739	0.00713677	-0.00272967	0.103585	-0.0446211	0.0394368	-0.0127864	0.539004	0.0135227	0.00474463	-0.0897284	0.447109	0.197312	0.00474463	-0.0897284
P19	0.698907	0.610381	0.736108	0.583864	0.586369	0.548947	0.579025	0.548319	0.71509	0.706364	0.728893	0.679991	0.682878	0.631096	0.624794	0.612758
P20	0.706039	0.61661	0.743619	0.589822	0.592353	0.554548	0.584934	0.553914	0.722387	0.713571	0.736331	0.686929	0.689846	0.637536	0.63117	0.619011
P21	0.0780424	0.196518	-0.0862282	-0.086078	0.161197	0.137269	0.28848	0.288774	0.112632	0.0954852	0.0523653	0.0527425	0.341753	0.198734	-0.0116333	-0.0109525
P22	0.108523	0.266574	0.276807	-0.142914	0.36443	0.192326	-0.253763	-1.18664	0.135548	0.206705	0.306901	0.136424	0.313663	0.0106193	-0.578711	-0.0387976
P23	0.16371	0.163352	0.146224	0.123574	0.250981	0.231238	0.060975	0.0964817	0.410091	0.340964	0.190584	0.0904816	0.336679	0.253954	0.106146	0.0974919
P24	0.165315	0.164953	0.147657	0.124786	0.253441	0.233505	0.0615727	0.0974276	0.414112	0.344307	0.192452	0.0913687	0.33998	0.256444	0.107187	0.0984477
P25	0.14367	0.207574	0.157815	0.131513	0.272202	0.250028	0.116596	0.00565723	0.489525	0.357099	0.124249	0.169549	0.382148	0.236948	0.069754	0.156631
P26	0.333327	0.280324	0.0349057	0.280324	0.0923782	0.0952132	0.0923782	0.0952132	0.238915	0.162046	-0.162046	-0.155391	0.0900625	0.160965	0.0900625	0.160965
P27	0.202769	0.286404	0.286404	-0.128289	0.082868	0.0284267	0.0284267	-0.0544862	-0.0175927	0.162901	-0.0175927	0.162901	0.0886752	-0.0664114	-0.0664114	-0.166298
P28	0.204682	0.289106	0.289106	-0.129499	0.0836498	0.0286949	0.0286949	-0.0550002	-0.0177587	0.164438	-0.0177587	0.164438	0.0895118	-0.0670379	-0.0670379	-0.167867
P29	-0.0825655	0.250259	0.055088	0.055088	0.344229	0.332465	0.265435	0.265435	-0.13739	0.0088194	-0.112565	-0.112565	-0.084771	-0.0586727	-0.067345	-0.067345
P30	0.163398	0.198622	0.138959	0.0815217	0.200917	0.184739	0.127485	0.0701055	0.288002	0.265168	0.0701055	0.0356959	0.230749	0.161905	0.0471695	0.091917
P31	0.0985497	0.232865	0.0707487	-0.0360234	0.232865	0.163391	0.0927602	-0.0244444	0.360234	0.301181	0.128655	0.0822696	0.290644	0.196971	0.0822696	0.128655
P32	0.0994456	0.234982	0.0713918	-0.0363509	0.234982	0.164876	0.0936035	-0.0246667	0.363509	0.303919	0.129825	0.0830175	0.293287	0.198761	0.0830175	0.129825
P33	0.293427	0.199111	0.210901	0.154573	0.295929	0.210901	0.154573	0.0837654	0.210901	0.237099	0.0484677	-0.0130994	0.17814	0.142784	0.0248889	0.072035
P34	0.132164	0.274899	0.0952901	0.0726782	0.179731	0.144058	0.120269	0.0489005	0.334374	0.286783	0.0952901	0.0607941	0.334374	0.239216	0.105731	0.155953
P35	0.202667	0.253333	0.169332	0.106667	0.265333	0.204133	0.145333	0.0961333	0.289321	0.253333	0.0852613	0.0253333	0.277332	0.193213	0.0733213	0.121333

## Sheet: Muscle_Desc
	count	Mean	SD	Min	P25	Median	P75	Max
SE_SpaVib_40Hz	35	0.195368	0.186057	-0.0825655	0.0989976	0.163398	0.202718	0.752791
SE_SpaVib_20Hz	35	0.242825	0.137845	0.0500144	0.19	0.232865	0.276748	0.65744
SE_ConsVib_20Hz	35	0.174518	0.205006	-0.0910187	0.0693194	0.138959	0.204833	0.79286
SE_ConsVib_40Hz	35	0.0895104	0.192625	-0.14936	-0.0352956	0.0678901	0.129698	0.628879
BF_SpaVib_40Hz	35	0.2355	0.146509	0.0613231	0.108153	0.232865	0.277587	0.631577
BF_SpaVib_20Hz	35	0.183539	0.151141	-0.0485567	0.0954651	0.178901	0.232371	0.591269
BF_ConsVib_20Hz	35	0.125826	0.187398	-0.265209	0.041176	0.0936035	0.145506	0.623667
BF_ConsVib_40Hz	35	0.0335181	0.354793	-1.24016	-0.0133503	0.0678901	0.0969546	0.590593
VL_SpaVib_40Hz	35	0.302152	0.222322	-0.13739	0.170214	0.312346	0.412101	0.770222
VL_SpaVib_20Hz	35	0.271122	0.179894	0.00861978	0.162902	0.256789	0.348578	0.760822
VL_ConsVib_20Hz	35	0.119456	0.224168	-0.162903	-0.00236856	0.0701055	0.12924	0.785089
VL_ConsVib_40Hz	35	0.0915133	0.210938	-0.156213	-0.026464	0.056789	0.139501	0.732416
RF_SpaVib_40Hz	35	0.256542	0.214815	-0.115813	0.0903007	0.290644	0.345084	0.735526
RF_SpaVib_20Hz	35	0.169076	0.188447	-0.0670379	0.0108588	0.189012	0.230202	0.679752
RF_ConsVib_20Hz	35	0.0549401	0.241555	-0.604813	-0.00344434	0.0529586	0.0903007	0.672965
RF_ConsVib_40Hz	35	0.100981	0.194076	-0.167867	-0.0251793	0.10089	0.142495	0.66
